# Supplementary material for: Metabolic Profiling of Pitaya (Hylocereus polyrhizus) during Fruit Development and Maturation
Source: PubMed Central journal article supplement (PMC6470951; doi:10.3390/molecules24061114), 2019-03-20
Supplement: molecules-24-01114-s001.pdf [file molecules-24-01114-s001.pdf]

Supplementary material:

Table S1. Metabolites derived from GC-MS and LC-MS/MS.

| Nob                           | RT (min) | Metabolites                      | $m/z[M + H]^+$ | Main Fragments           | References   |
|-------------------------------|----------|----------------------------------|----------------|--------------------------|--------------|
| Amino Acids and Amines        |          |                                  |                |                          |              |
| 1                             | 4.22     | Alanine <sup>a</sup>             | --             | 147, 73, 116, 79         | STD and NIST |
| 2                             | 6.43     | Acetamide <sup>a</sup>           | --             | 220, 73, 79, 58, 147     | NIST         |
| 3                             | 6.57     | Valine <sup>a</sup>              | --             | 144, 73, 147, 79         | STD and NIST |
| 4                             | 1.86     | Leucine <sup>b</sup>             | 132            | 86, 55                   | Ref 57       |
| 5                             | 8.73     | proline <sup>a</sup>             | --             | 73, 142, 79, 158, 52     | STD and NIST |
| 6                             | 9.05     | Glycine <sup>a</sup>             | --             | 248, 174, 73, 79, 147,   | STD and NIST |
| 7                             | 10.89    | Serine <sup>a</sup>              | --             | 100, 147, 204, 218       | STD and NIST |
| 8                             | 11.81    | Threonine <sup>a</sup>           | --             | 73, 79, 117, 147         | STD and NIST |
| 9                             | 12.97    | Lysine <sup>a</sup>              | --             | 290, 73, 174, 147, 79    | NIST         |
| 10                            | 16.46    | Aspartic Acid <sup>a</sup>       | --             | 232, 73, 147, 100, 156   | STD and NIST |
| 11                            | 16.55    | GABA <sup>a</sup>                | --             | 304, 174, 73, 147, 86    | STD and NIST |
| 12                            | 9.98     | Glutamic Acid <sup>a</sup>       | --             | 246, 73, 147, 128, 192   | STD and NIST |
| 13                            | 23.81    | 1,4 -Butanediamine <sup>a</sup>  | --             | 174, 73, 59              | NIST         |
| 14                            | 25.32    | Glutamine <sup>a</sup>           | --             | 147, 84, 102, 130        | STD and NIST |
| 15                            | 1.39     | Isoleucine <sup>b</sup>          | 132            | 86, 55                   | Ref 57       |
| 16                            | 1.11     | Arginine <sup>b</sup>            | 175            | 116, 60                  | Ref 57       |
| 17                            | 6.13     | Tryptamine <sup>b</sup>          | 161            | 144, 117, 91, 65         | Ref 57       |
| 18                            | 1.35     | Tyramine <sup>b</sup>            | 138            | 121, 103                 | Ref 57       |
| 19                            | 1.82     | Tyrosine <sup>b</sup>            | 182            | 91, 136, 119             | Ref 57       |
| 20                            | 1.87     | Methionine <sup>b</sup>          | 150            | 61, 104, 75, 81, 54      | Ref 567      |
| 21                            | 2.96     | Phenylalanine <sup>b</sup>       | 166            | 120, 103, 93, 72         | Ref 57       |
| 22                            | 5.67     | Tryptophan <sup>b</sup>          | 205            | 146, 118, 188            | Ref 57       |
| Sugars and Sugar Alcohols     |          |                                  |                |                          |              |
| 23                            | 29.28    | Fructose <sup>a</sup>            | --             | 217, 103, 147, 133       | STD and NIST |
| 24                            | 30.13    | Glucose <sup>a</sup>             | --             | 217, 147, 191, 204       | STD and NIST |
| 25                            | 52.89    | Sucrose <sup>a</sup>             | --             | 361, 73, 103, 147, 217   | STD and NIST |
| 26                            | 30.72    | Sorbose <sup>a</sup>             | --             | 319, 73, 147, 205, 103,  | STD and NIST |
| 27                            | 23.17    | Ribitol <sup>a</sup>             | --             | 217, 73, 103, 147        | NIST         |
| 28                            | 28.03    | Sorbitol <sup>a</sup>            | --             | 259, 73, 147, 190, 129,  | NIST         |
| 29                            | 29.90    | Mannose <sup>a</sup>             | --             | 319, 73, 147, 103, 160,  | NIST         |
| 30                            | 35.99    | Glycoside <sup>a</sup>           | --             | 319, 73, 204, 147, 103,  | NIST         |
| 31                            | 52.43    | Fucose <sup>a</sup>              | --             | 333, 73, 117, 147, 219   | NIST         |
| 32                            | 52.19    | Mannobiose <sup>a</sup>          | --             | 361, 73, 204, 147, 129,  | NIST         |
| 33                            | 33.70    | Glucopyranose <sup>a</sup>       | --             | 217, 73, 191, 147, 129   | NIST         |
| 34                            | 27.24    | Fructopyranose <sup>a</sup>      | --             | 217, 73, 204, 147        | NIST         |
| 35                            | 29.85    | Talopyranose <sup>a</sup>        | --             | 73, 204, 191, 147, 217   | NIST         |
| 36                            | 26.99    | Tagatofuranose <sup>a</sup>      | --             | 257, 73, 217, 147        | NIST         |
| 37                            | 21.86    | Xylose <sup>a</sup>              | --             | 147, 91, 204, 217        | NIST         |
| 38                            | 38.44    | Myo-Inositol <sup>a</sup>        | --             | 147, 217, 305, 308       | NIST         |
| Organic Acids and Fatty Acids |          |                                  |                |                          |              |
| 39                            | 15.37    | Malic Acid <sup>a</sup>          | --             | 189, 113, 175, 219       | STD and NIST |
| 40                            | 14.69    | Citramalic Acid <sup>a</sup>     | --             | 247, 73, 75, 115, 147    | STD and NIST |
| 41                            | 9.17     | Succinic Acid <sup>a</sup>       | --             | 249, 147, 73, 75, 79, 58 | STD and NIST |
| 42                            | 10.23    | Fumaric Acid <sup>a</sup>        | --             | 127, 71, 69, 99, 56      | STD and NIST |
| 43                            | 27.20    | Citrus Acid <sup>a</sup>         | --             | 347, 73, 147, 273        | STD and NIST |
| 44                            | 28.75    | Quinic Acid <sup>a</sup>         | --             | 345, 73, 147, 75, 55     | STD and NIST |
| 45                            | 19.64    | Tartaric Acid <sup>a</sup>       | --             | 292, 73, 147, 117        | STD and NIST |
| 46                            | 27.89    | 2-ketoglutaric Acid <sup>a</sup> | --             | 245, 73, 147, 173, 55    | NIST         |
| 47                            | 34.76    | Hexadecanoic Acid <sup>a</sup>   | --             | 313, 73, 117, 132, 55    | NIST         |

|                                   |       |                                             |      |                         |              |
|-----------------------------------|-------|---------------------------------------------|------|-------------------------|--------------|
| 48                                | 31.87 | Glucuronic Acid <sup>a</sup>                | --   | 333, 73, 147, 160, 189  | NIST         |
| 49                                | 46.49 | Octadecanoic Acid <sup>a</sup>              | --   | 341, 73, 117, 129, 55   | NIST         |
| 50                                | 47.96 | 9,12,15-Octadecatrienoic Acid <sup>a</sup>  | --   | 319, 73, 147, 93, 207   | NIST         |
| 51                                | 10.82 | 2-Piperidinecarboxylic Acid <sup>a</sup>    | --   | 156, 73, 79, 147        | NIST         |
| 52                                | 4.49  | Oxalic Acid <sup>a</sup>                    | --   | 147, 73, 133            | STD and NIST |
| 53                                | 18.23 | Threonic Acid <sup>a</sup>                  | --   | 292, 73, 147, 220, 117  | NIST         |
| Betalains and Betalain Precursors |       |                                             |      |                         |              |
| 54                                | 4.53  | Betain <sup>b</sup>                         | 551  | 389                     | Ref. 1       |
| 55                                | 5.94  | Isobetain <sup>b</sup>                      | 551  | 188, 389                | Ref. 1       |
| 56                                | 6.52  | Phyllocatin <sup>b</sup>                    | 637  | 593, 551, 389           | Ref. 58      |
| 57                                | 13.06 | Betalamic Acid <sup>b</sup>                 | 212, | 168, 194, 105           | Ref. 1       |
| 58                                | 8.89  | Hylocerin <sup>b</sup>                      | 695  | 651, 551, 389           | Ref. 58      |
| 59                                | 8.97  | Quercetin 3-O-rutinoside <sup>b</sup>       | 611  | 303, 465                | Ref. 57      |
| 60                                | 17.43 | Cyclo-5-O-glucoside <sup>b</sup>            | 358  | 340, 106, 88, 70, 57    | Ref. 1       |
| Other Metabolites                 |       |                                             |      |                         |              |
| 61                                | 7.91  | H <sub>3</sub> PO <sub>4</sub> <sup>a</sup> | --   | 186, 174, 73, 147, 100, | NIST         |
| 62                                | 18.95 | Butane <sup>a</sup>                         | --   | 306, 73, 117, 147, 205  | NIST         |
| 63                                | 10.06 | Vebronol <sup>b</sup>                       | 453  | 322, 209, 114           | Ref. 59      |
| 64                                | 18.14 | Sespendole <sup>b</sup>                     | 520  | 184                     | Ref. 59      |
| 65                                | 18.04 | Vapiprost <sup>b</sup>                      | 478  | 337                     | Ref. 59      |

**Note:** Metabolites <sup>(a)</sup>, Metabolites derived from GC-MS. Metabolites <sup>(b)</sup>, Metabolites derived from LC-MS/MS. STD, standard compound. Ref, reference. --, Data unlisted.

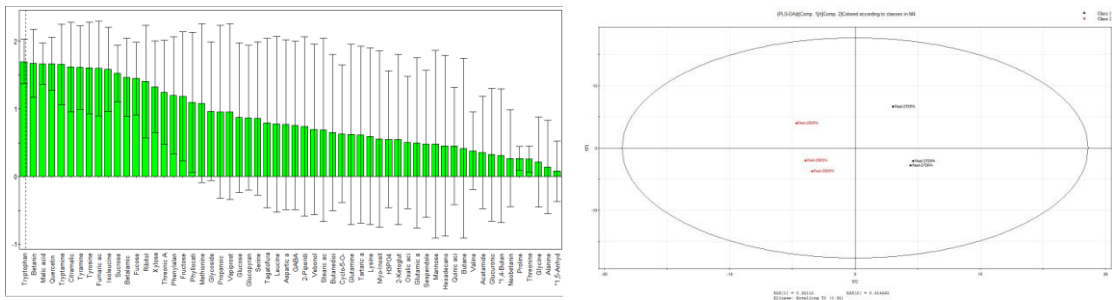

**Figure S1.** Peel-29DPA vs. Peel-27DPA.

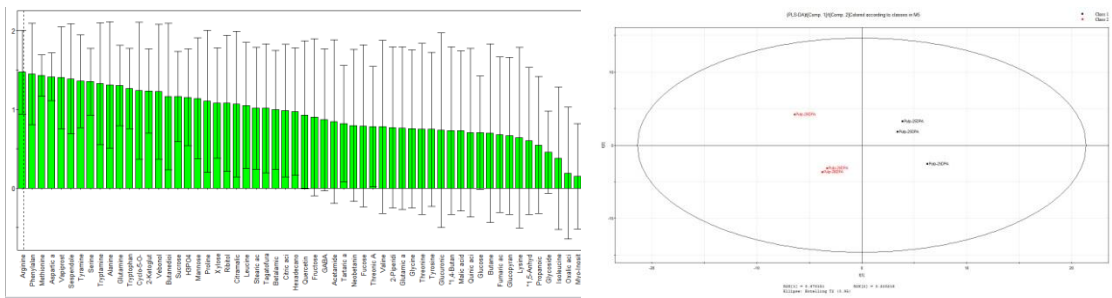

**Figure S2.** Pulp-26DPA vs. Pulp-25DPA.

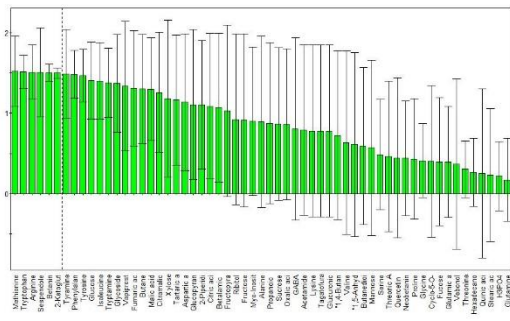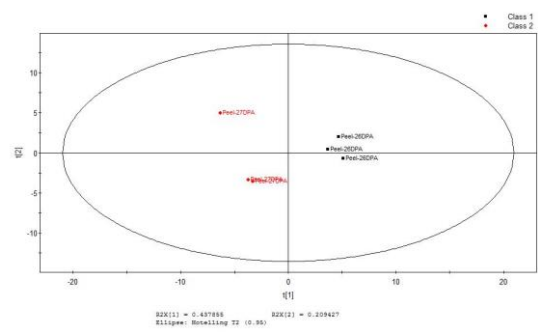

Figure S3. Pulp-26DPA vs. Pulp-27DPA.
